# Supplementary material
Source: publisher figshare collection journal article supplement (https://acs.figshare.com/ndownloader/files/4117186)
Supplement: Supplementary file 1 [file 4117186]

# Supplemental Information

## 5-Arylidenethioxothiazolidinones as Inhibitors of Tyrosyl-DNA

### Phosphodiesterase I (Tdp1)

*Venkata Ramana Sirivolu<sup>†a</sup>, Sanjeev Vernekar<sup>†a</sup>, Christophe Marchand<sup>†b</sup>, Alena Naumova<sup>b</sup>,  
Adel Chergui<sup>b</sup>, Amelie Renaud<sup>b</sup>, Andrew G. Stephen<sup>c</sup>, Feng Chen<sup>a</sup>, Yuk Y. Sham<sup>a</sup>, Yves  
Pommier<sup>\*b</sup> and Zhengqiang Wang<sup>\*a</sup>*

<sup>a</sup>Center for Drug Design, Academic Health Center, University of Minnesota, Minneapolis, MN 55455

<sup>b</sup>Laboratory of Molecular Pharmacology, National Cancer Institute, National Institutes of Health, Bethesda, MD 20892

<sup>c</sup>Protein Chemistry Laboratory, Advanced Technology Program, SAIC-Frederick, Inc., Frederick National Laboratory for Cancer Research, Frederick, MD 21702

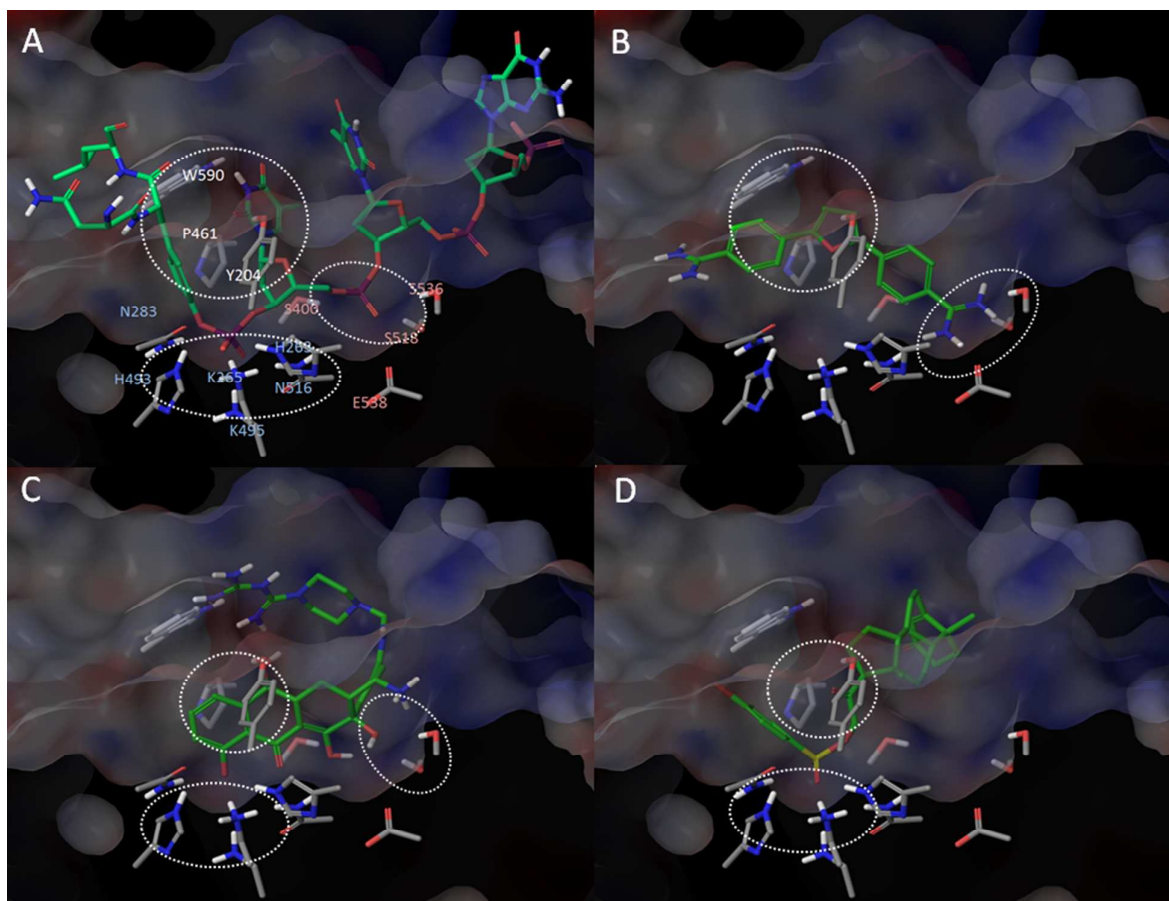

**Fig. 1S.** Modeled structure of Human Tdp1 (PDB: 1NOP) with (A) Top1-DNA substrate; (B) **1**, (C) **2**, and (D) **3**. The hydrophobic (labeled in white), the catalytic (labeled in blue), and the adjacent hydrophilic region (labeled in red) are shown. The models showed at least two of the three regions are essential for effective inhibitory binding (circled).
